# Supplementary material for: Topotactic phase transformation of lithiated spinel to layered LiMn 0.5 Ni 0.5 O 2 : the interaction of 3-D and 2-D Li-ion diffusion
Source: Royal Society of Chemistry journal article supplement (doi:10.1039/d4ta06238h), 2024-11-26
Supplement: d4ta06238h1.pdf [file d4ta06238h1.pdf]

## Supporting Information

### **Topotactic Phase Transformation of Lithiated Spinel to Layered LiMn<sub>0.5</sub>Ni<sub>0.5</sub>O<sub>2</sub>: The Interaction of 3-D and 2-D Li-ion Diffusion**

Boyu Shi<sup>1</sup>, Jihyeon Gim<sup>1</sup>, Tianyi Li<sup>2</sup>, Krishna Koirala<sup>3</sup>, Chongmin Wang<sup>4</sup>, Dewen Hou<sup>5,6</sup>, Yuzi Liu<sup>5</sup>, Jacob Jorne<sup>7</sup>, Jason R. Croy<sup>1</sup>, Michael M. Thackeray<sup>1</sup>, and Eungje Lee<sup>1,\*</sup>

<sup>1</sup> Electrochemical Energy Storage Department, Chemical Sciences and Engineering Division, Argonne National Laboratory, Lemont, IL 60439, USA

<sup>2</sup> X-ray Science Division, Advanced Photon Source, Argonne National Laboratory, Lemont, IL 60439, USA

<sup>3</sup> Physical and Computational Sciences Directorate, Pacific Northwest National Laboratory, Richland, WA 99354, USA

<sup>4</sup> Environmental Molecular Sciences Laboratory, Pacific Northwest National Laboratory, Richland, WA 99354, USA

<sup>5</sup> Nanoscience and Technology Division, Argonne National Laboratory, Lemont, IL 60439, USA

<sup>6</sup> Micron School of Materials Science and Engineering, Boise State University, Boise, Idaho 83725, USA

<sup>7</sup> Department of Chemical Engineering, University of Rochester, Rochester, NY 14627, USA

**Table S1.** The 1<sup>st</sup> cycle charge/discharge specific capacity and the initial Coulombic efficiency of Li/LMNO400-900 cells ( $V = 2.5-5.0$  V vs. Li,  $i = 15$  mA/g, 30 °C).

| Sample  | 1 <sup>st</sup> cycle charge capacity (mAh/g) | 1 <sup>st</sup> cycle 1 <sup>st</sup> discharge capacity (mAh/g) | Initial Coulombic efficiency |
|---------|-----------------------------------------------|------------------------------------------------------------------|------------------------------|
| LMNO400 | 268.4                                         | 223.0                                                            | 83.0%                        |
| LMNO500 | 238.7                                         | 196.2                                                            | 82.2%                        |
| LMNO600 | 211.4                                         | 179.7                                                            | 85.0%                        |
| LMNO700 | 201.6                                         | 174.7                                                            | 86.7%                        |
| LMNO800 | 207.6                                         | 187.4                                                            | 90.3%                        |
| LMNO900 | 224.4                                         | 188.9                                                            | 84.2%                        |

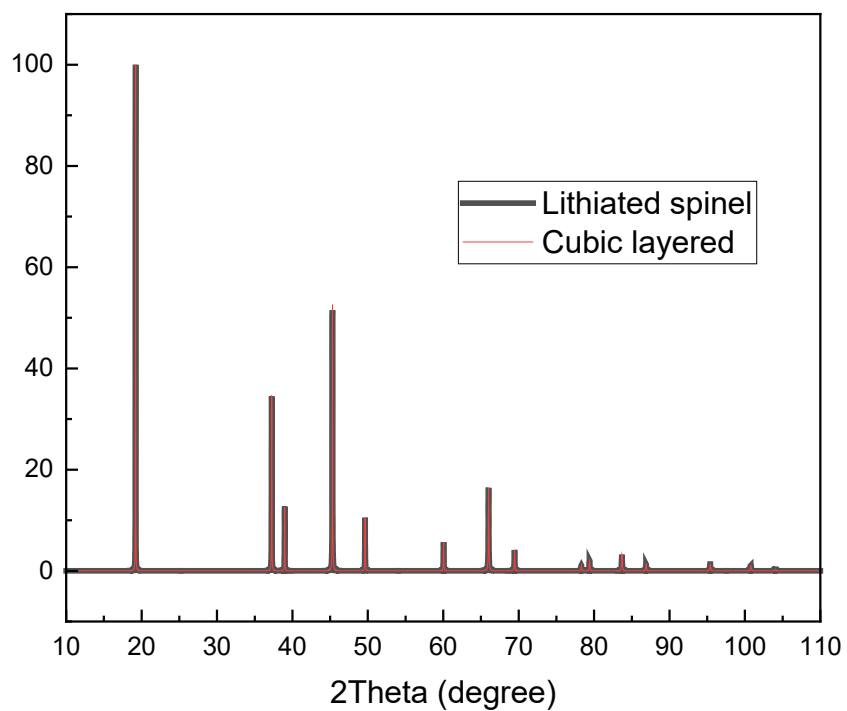

**Figure S1.** Calculated XRD patterns for a cubic ( $Fd-3m$ ) lithiated spinel  $\text{LiMO}_2$  ( $\text{Li}_2\text{M}_2\text{O}_4$ ) structure and a trigonal ( $R-3m$ ) layered  $\text{LiMO}_2$  structure such as  $\text{LiCoO}_2$  ( $\text{Li}_2\text{Co}_2\text{O}_4$ ) that are identical, as described in [E. Rossen, J. N. Reimers, and J. R. Dahn, Synthesis and Electrochemistry of Spinel LT- $\text{LiCoO}_2$ . *Solid State Ionics*, 1993, **62**, 53-60].

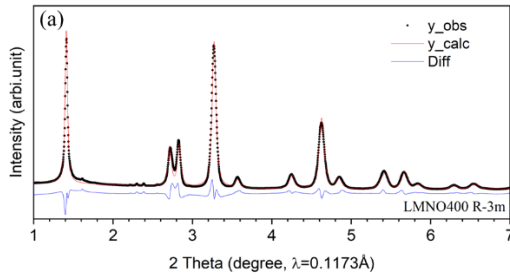

a=2.901035 Å, c=14.22494 Å, c/a=4.903;  $R_{wp}=13.783$ ,  $KaI^2=17.22$

| Atom | Position | x | y | z     | Occ   | U      |
|------|----------|---|---|-------|-------|--------|
| Li1  | 3a       | 0 | 0 | 0     | 0.822 | 0.0406 |
| Li2  | 3b       | 0 | 0 | 0.5   | 0.178 | 0.0018 |
| M1   | 3a       | 0 | 0 | 0     | 0.178 | 0.0406 |
| M2   | 3b       | 0 | 0 | 0.5   | 0.822 | 0.0018 |
| O    | 6c       | 0 | 0 | 0.238 | 1     | 0.0109 |

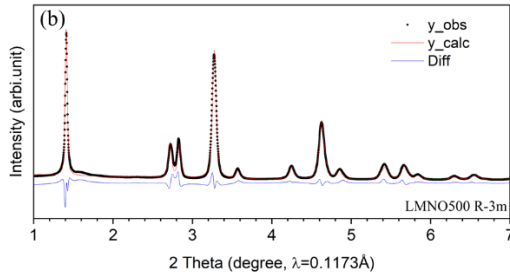

a=2.89817 Å, c=14.23131 Å, c/a=4.91;  $R_{wp}=12.036$ ,  $KaI^2=9.25$

| Atom | Position | x | y | z     | Occ   | U      |
|------|----------|---|---|-------|-------|--------|
| Li1  | 3a       | 0 | 0 | 0     | 0.840 | 0.041  |
| Li2  | 3b       | 0 | 0 | 0.5   | 0.160 | 0.0015 |
| M1   | 3a       | 0 | 0 | 0     | 0.160 | 0.041  |
| M2   | 3b       | 0 | 0 | 0.5   | 0.840 | 0.0015 |
| O    | 6c       | 0 | 0 | 0.242 | 1     | 0.0104 |

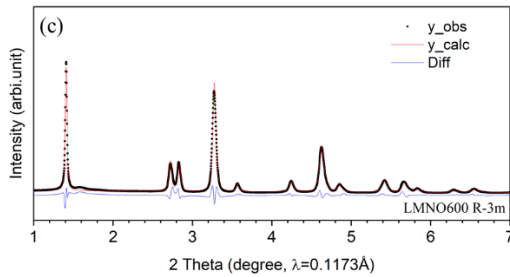

a=2.89483 Å, c=14.28206 Å, c/a=4.934;  $R_{wp}=11.107$ ,  $KaI^2=8.61$

| Atom | Position | x | y | z     | Occ   | U      |
|------|----------|---|---|-------|-------|--------|
| Li1  | 3a       | 0 | 0 | 0     | 0.864 | 0.041  |
| Li2  | 3b       | 0 | 0 | 0.5   | 0.136 | 0.0015 |
| M1   | 3a       | 0 | 0 | 0     | 0.136 | 0.041  |
| M2   | 3b       | 0 | 0 | 0.5   | 0.864 | 0.0015 |
| O    | 6c       | 0 | 0 | 0.243 | 1     | 0.0104 |

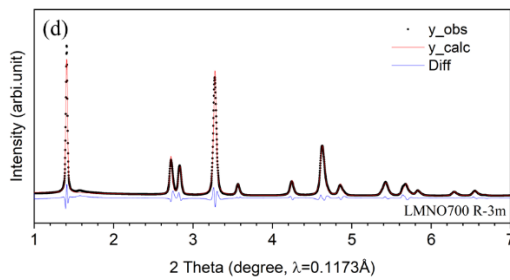

a=2.89322 Å, c=14.28879 Å, c/a=4.939;  $R_{wp}=10.296$ ,  $KaI^2=7.82$

| Atom | Position | x | y | z     | Occ   | U      |
|------|----------|---|---|-------|-------|--------|
| Li1  | 3a       | 0 | 0 | 0     | 0.877 | 0.021  |
| Li2  | 3b       | 0 | 0 | 0.5   | 0.123 | 0.0088 |
| M1   | 3a       | 0 | 0 | 0     | 0.123 | 0.021  |
| M2   | 3b       | 0 | 0 | 0.5   | 0.877 | 0.0088 |
| O    | 6c       | 0 | 0 | 0.259 | 1     | 0.0096 |

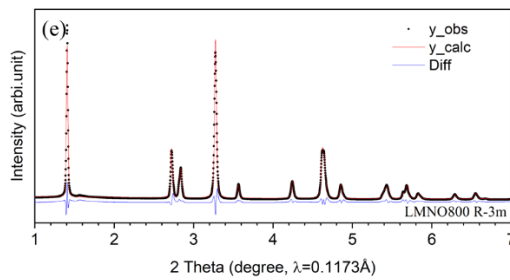

a=2.89222 Å, c=14.29834 Å, c/a=4.944;  $R_{wp}=8.565$ ,  $KaI^2=6.68$

| Atom | Position | x | y | z     | Occ   | U      |
|------|----------|---|---|-------|-------|--------|
| Li1  | 3a       | 0 | 0 | 0     | 0.893 | 0.021  |
| Li2  | 3b       | 0 | 0 | 0.5   | 0.107 | 0.0088 |
| M1   | 3a       | 0 | 0 | 0     | 0.107 | 0.021  |
| M2   | 3b       | 0 | 0 | 0.5   | 0.893 | 0.0088 |
| O    | 6c       | 0 | 0 | 0.258 | 1     | 0.0096 |

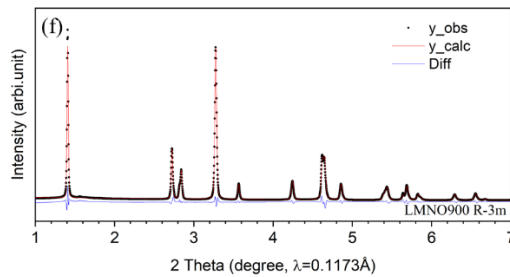

a=2.889658 Å, c=14.29168 Å, c/a=4.945;  $R_{wp}=8.424$ ,  $KaI^2=6.37$

| Atom | Position | x | y | z     | Occ   | U      |
|------|----------|---|---|-------|-------|--------|
| Li1  | 3a       | 0 | 0 | 0     | 0.899 | 0.0017 |
| Li2  | 3b       | 0 | 0 | 0.5   | 0.101 | 0.0063 |
| M1   | 3a       | 0 | 0 | 0     | 0.101 | 0.0017 |
| M2   | 3b       | 0 | 0 | 0.5   | 0.899 | 0.0063 |
| O    | 6c       | 0 | 0 | 0.258 | 1     | 0.0092 |

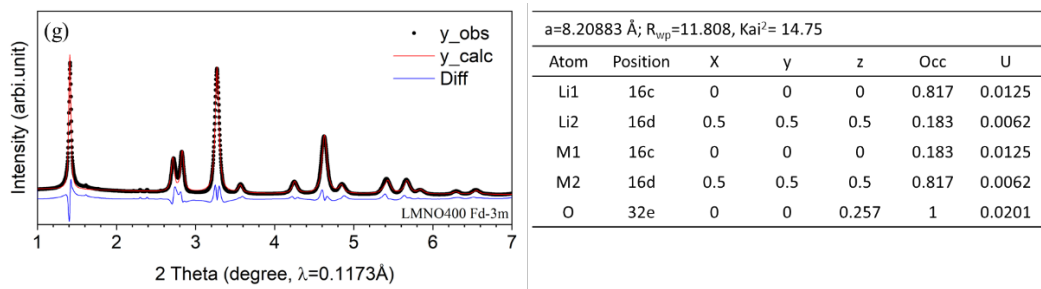

**Figure S2.** XRD Rietveld refinement data of (a-f) LMNO400-900 with  $R-3m$  symmetry and (g) LMNO400 sample with  $Fd-3m$  symmetry.

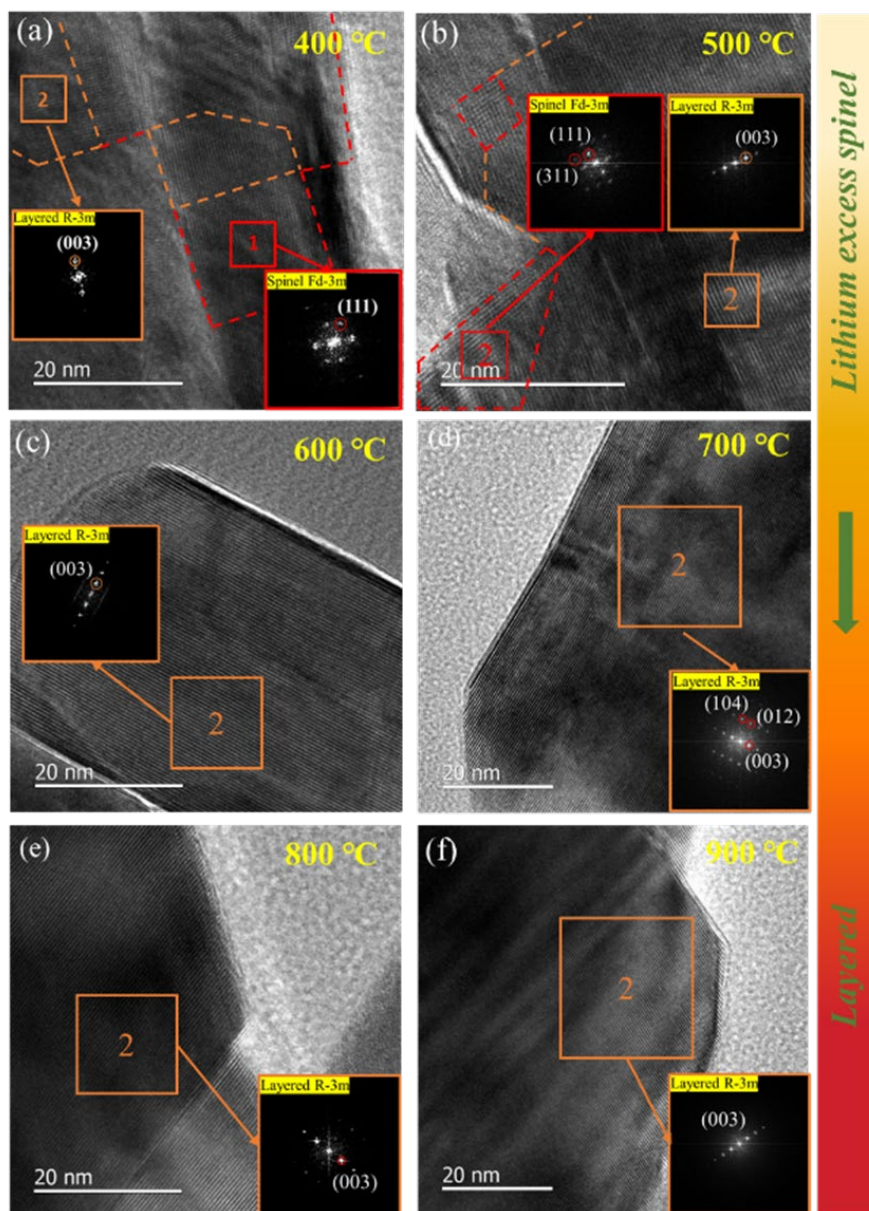

**Figure S3.** HR-TEM images and FFTs (inset) of (a) LMNO400, (b) LMNO500, (c) LMNO600, (d) LMNO700, (e) LMNO800, and (f) LMNO900.

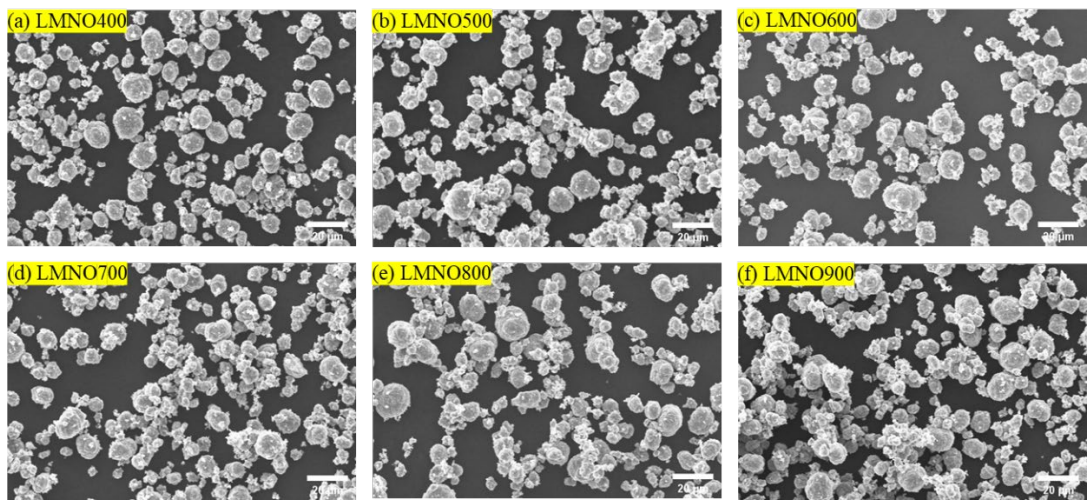

**Figure S4.** SEM images of (a) LMNO400, (b) LMNO500, (c) LMNO600, (d) LMNO700, (e) LMNO800, and (f) LMNO900 samples.

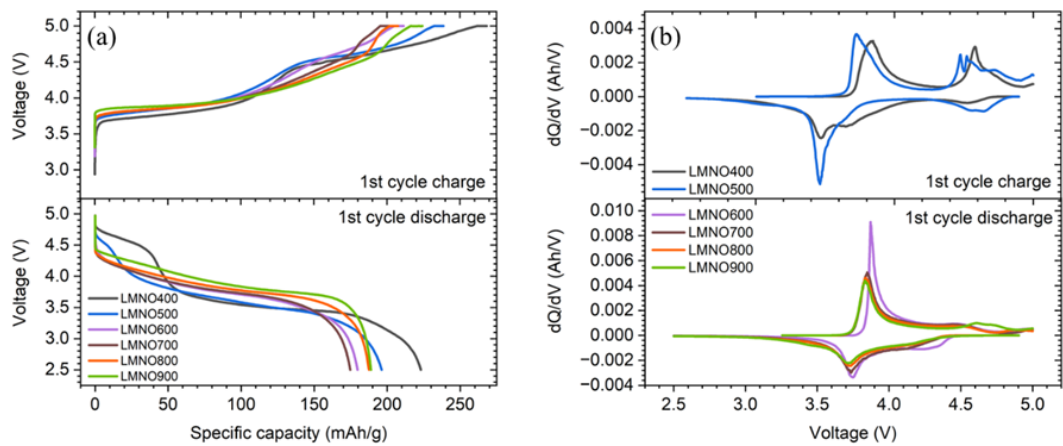

**Figure S5.** (a) The 1<sup>st</sup> charge-discharge voltage profiles and (b) dQ/dV plots of Li/LMNO400-900 cells ( $V = 2.5\text{-}5.0$  V vs. Li,  $i = 15$  mA/g,  $30$  °C).



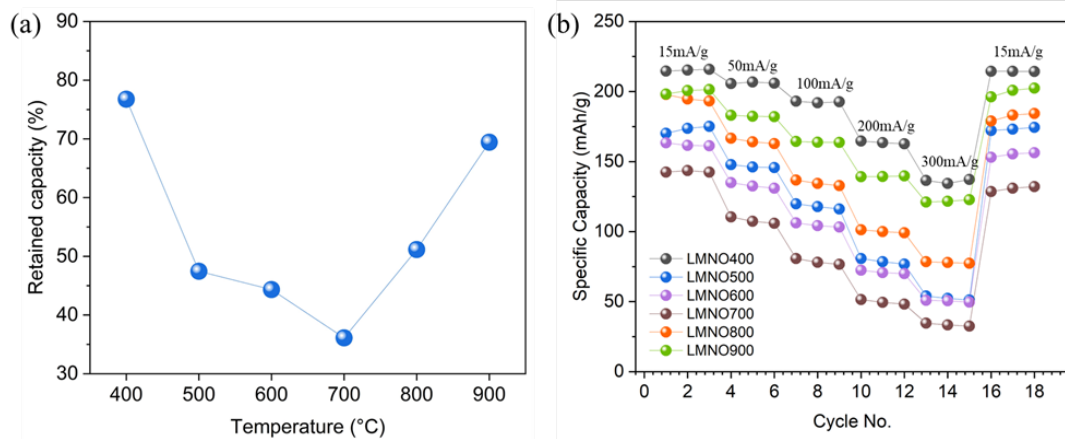

**Figure S6.** (a) LMNO400-900 electrodes' percentage of retained capacity at 200 mA/g with respect to 15 mA/g and (b) rate performance for the LMNO400-900 electrodes ( $V = 2.5-5.0$  V vs. Li,  $30$  °C).

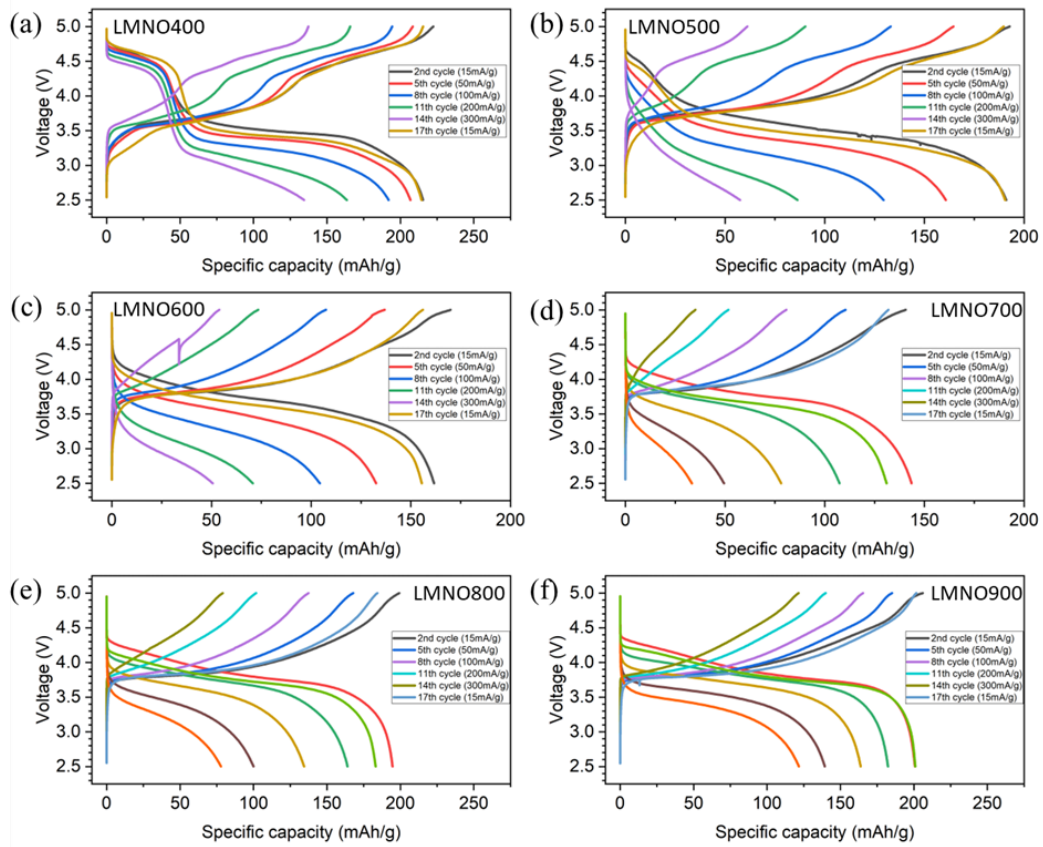

**Figure S7.** Representative voltage profiles of the (a)-(f) LMNO400-900 electrodes under different current densities.

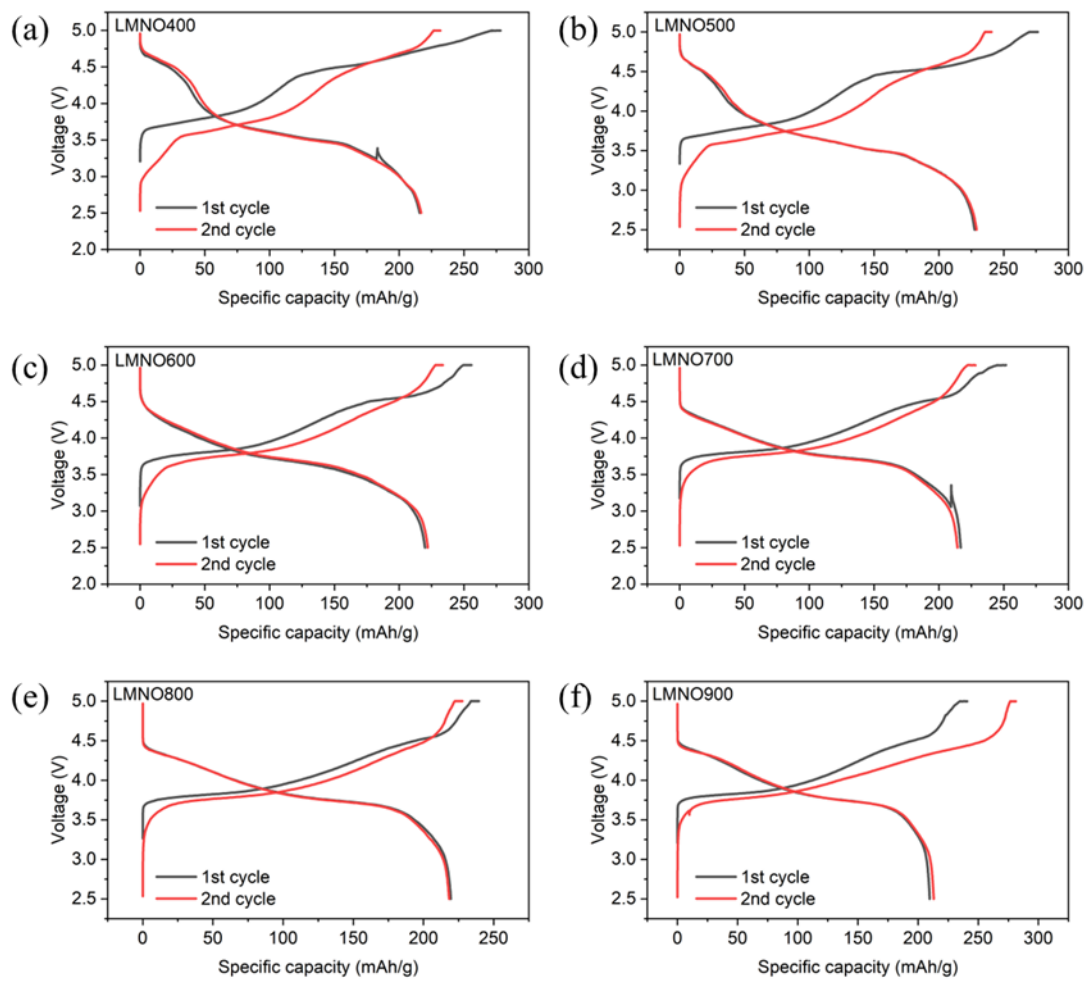

**Figure S8.** The 1<sup>st</sup> and 2<sup>nd</sup> cycle charge-discharge voltage profiles of Li/LMNO400-900 cells tested at 50 °C ( $V = 2.5\text{-}5.0$  V vs. Li,  $i = 15$  mA/g).

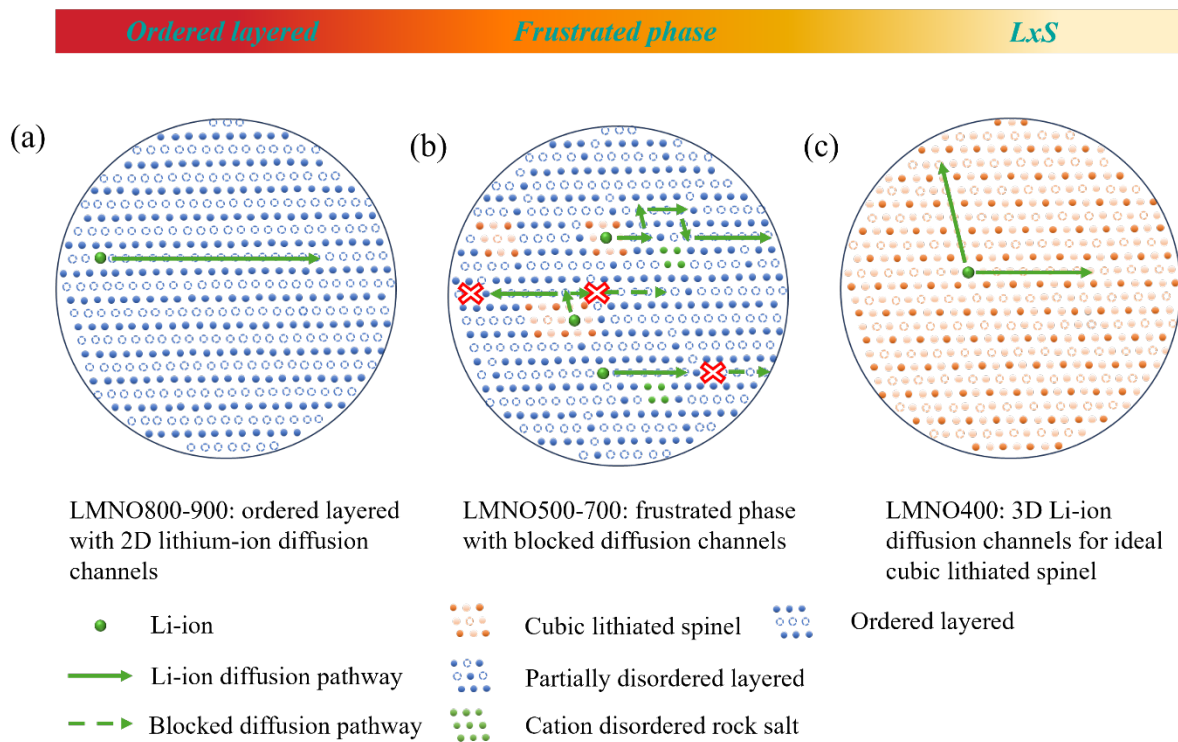

**Figure S9.** Schematic illustration of the effect of LMNO local structures on Li-ion diffusion channels; (a) ordered layered (b) frustrated structure and (c) LxS.
